# Supplementary material for: Characterization of Copy Number Variation’s Potential Role in Marek’s Disease
Source: Int J Mol Sci. 2017 May 9;18(5):1020. doi: 10.3390/ijms18051020 (PMC5454933; doi:10.3390/ijms18051020)
Supplement: Supplementary file 1 [file ijms-18-01020-s001.zip]

Archive with 4 entries (4 files):
- Table S1.xlsx
- Table S2.xlsx
- Table S3.xlsx
- Figure S1.pdf
