# Supplementary material for: Characterization of Copy Number Variation’s Potential Role in Marek’s Disease
Source: Int J Mol Sci. 2017 May 9;18(5):1020. doi: 10.3390/ijms18051020 (PMC5454933; doi:10.3390/ijms18051020)
Supplement: Supplementary file 1 [file ijms-18-01020-s001.zip › Table S1.xlsx]

## Sheet: Sheet1
Chromosome Name	Start Position	End Position	Length (bp)	# Markers	Marker	rs Num	Marker Mean	Num 3 State Loss	Num 3 State Neutral	Num 3 State Gain	|3 State Pos Threshold - Mean|	|Mean - 3 State Neg Threshold|	Loss_frequence	Neutral_frequence	gain_frequence	SampleID	refGene
1	1465247	1472368	7122	3	AX-75288552	rs14081356	0.201558	1	20	9	0.0984419	0.501558	0.0333333	0.666667	0.3	F1_67_3;Line72_1;F1_67_1;Line72_2;F1_76_1;F1_67_2;Line72_3;F1_76_2;F1_76_3;J1	EXOC4
1	20141929	20143536	1608	3	AX-75404066	rs316674577	0.231575	0	21	9	0.0684253	0.531575	0	0.7	0.3	F1_67_3;Line72_1;F1_67_1;Line72_2;F1_76_1;F1_67_2;Line72_3;F1_76_2;F1_76_3	NOT_FOUND
1	29184448	29187962	3515	3	AX-75422204	rs316250448	0.260183	0	18	12	0.039817	0.560183	0	0.6	0.4	F1_67_3;Line72_1;F1_67_1;Line72_2;F1_76_1;F1_67_2;Line72_3;F1_76_2;F1_76_3;M11;M4;M5	NOT_FOUND
1	45487619	45492239	4621	3	AX-75456063	rs14818397	0.257791	0	17	13	0.0422087	0.557791	0	0.566667	0.433333	F1_67_3;Line72_1;F1_67_1;Line72_2;F1_76_1;F1_67_2;Line72_3;F1_76_2;F1_76_3;J1;J2;J3;N1	NOT_FOUND
1	67538315	67539076	762	3	AX-75502520	rs317178624	0.208357	1	17	12	0.0916435	0.508357	0.0333333	0.566667	0.4	F1_67_3;Line72_1;F1_67_1;Line72_2;F1_76_1;F1_67_2;Line72_3;F1_76_2;F1_76_3;J3;X1;X3;X4	NOT_FOUND
1	84250750	84254670	3921	3	AX-80931890	rs315400119	-0.208247	6	24	0	0.508247	0.0917532	0.2	0.8	0	Line72_1;Line72_2;Line72_3;N1;N2;N3	TBC1D23
1	100913482	100917674	4193	3	AX-75190050	rs315418480	0.468877	0	18	12	0.168877	0.768877	0	0.6	0.4	F1_67_3;Line72_1;F1_67_1;Line72_2;F1_76_1;F1_67_2;Line72_3;F1_76_2;F1_76_3;M11;M4;M5	NOT_FOUND
1	109255317	109260052	4736	3	AX-75208836	rs313898093	-0.20747	4	26	0	0.50747	0.0925298	0.133333	0.866667	0	Line72_1;Line72_2;Line72_3;F1_76_3	NOT_FOUND
1	110691205	110734115	42911	4	AX-75212060	rs13922560	0.258575	0	21	9	0.041425	0.558575	0	0.7	0.3	F1_67_3;Line72_1;F1_67_1;Line72_2;F1_76_1;F1_67_2;Line72_3;F1_76_2;F1_76_3	NOT_FOUND
1	117029591	117032799	3209	3	AX-75225223	rs317583768	0.189434	2	17	11	0.110566	0.489434	0.0666667	0.566667	0.366667	F1_67_3;Line72_1;F1_67_1;Line72_2;F1_76_1;F1_67_2;Line72_3;F1_76_2;F1_76_3;J1;J2;J3;S5_RCS	NOT_FOUND
1	129349780	129351269	1490	3	AX-80744606	rs14887052	0.375515	1	17	12	0.0755148	0.675515	0.0333333	0.566667	0.4	F1_67_3;Line72_1;F1_67_1;Line72_2;Line63_2;F1_76_1;F1_67_2;Line72_3;F1_76_2;F1_76_3;J1;J2;J3	NOT_FOUND
1	131947334	131951194	3861	3	AX-75257145	rs13941380	0.398419	1	17	12	0.098419	0.698419	0.0333333	0.566667	0.4	F1_67_3;Line72_1;F1_67_1;Line72_2;F1_76_1;F1_67_2;Line72_3;F1_76_2;F1_76_3;J1;J2;J3;X1	REV1
1	143182237	143197191	14955	8	AX-75281387	rs313091319	-0.0708045	12	14	4	0.370804	0.229196	0.4	0.466667	0.133333	Line63_1;Line63_2;Line72_3;Line63_3;C1;J1;J2;J3;N2;N3;S1;S2;S5_RCS;X1;X3;X4	NOT_FOUND
1	160965706	161040375	74670	3	AX-75317268	rs314636071	-0.502627	9	21	0	0.802627	0.202627	0.3	0.7	0	Line72_1;Line72_2;Line63_1;Line63_2;F1_67_2;Line72_3;Line63_3;F1_76_2;M11	NOT_FOUND
1	165704352	165705825	1474	3	AX-75327124	rs316338145	0.191315	0	20	10	0.108685	0.491315	0	0.666667	0.333333	F1_67_3;Line72_1;F1_67_1;Line72_2;F1_76_1;F1_67_2;Line72_3;F1_76_2;F1_76_3;J2	NOT_FOUND
1	179802931	179804763	1833	3	AX-75360930	rs313369608	-0.183093	8	21	1	0.483093	0.116907	0.266667	0.7	0.0333333	Line72_1;Line72_2;F1_67_2;Line72_3;F1_76_2;C1;C2;C3;N2	NOT_FOUND
1	185083531	185085947	2417	3	AX-80790433	rs313235560	0.332139	0	17	13	0.0321393	0.632139	0	0.566667	0.433333	F1_67_3;Line72_1;F1_67_1;Line72_2;F1_76_1;F1_67_2;Line72_3;F1_76_2;F1_76_3;C3;J1;J2;J3	NOT_FOUND
2	942023	969144	27122	3	AX-76193885	rs317217510	-0.16963	7	21	2	0.46963	0.13037	0.233333	0.7	0.0666667	F1_67_3;Line72_1;Line72_2;F1_76_1;Line72_3;F1_76_2;S2;S5_RCS;X1	NOT_FOUND
2	3415375	3423818	8444	3	AX-76079123	rs318113519	-0.110706	12	12	6	0.410706	0.189294	0.4	0.4	0.2	F1_67_3;Line72_1;F1_67_1;Line72_2;Line63_1;Line63_2;F1_76_1;F1_67_2;Line72_3;Line63_3;F1_76_2;F1_76_3;M11;N1;S1;S2;S5_RCS;X3	MYL3
2	5223459	5229167	5709	3	AX-80884310	rs15057136	-0.17536	12	14	4	0.47536	0.12464	0.4	0.466667	0.133333	F1_67_3;Line72_1;F1_67_1;Line72_2;Line63_1;F1_76_1;F1_67_2;Line72_3;F1_76_2;F1_76_3;C2;N2;N3;S1;S2;S5_RCS	NOT_FOUND
2	6171729	6176933	5205	3	AX-76127169	rs313937306	0.0247939	5	16	9	0.275206	0.324794	0.166667	0.533333	0.3	F1_67_3;Line72_1;F1_67_1;Line72_2;Line63_2;Line72_3;F1_76_3;C3;J1;M4;M5;N2;S5_RCS;X4	NOT_FOUND
2	10419158	10420661	1504	3	AX-75957167	rs314408500	-0.130048	7	22	1	0.430048	0.169952	0.233333	0.733333	0.0333333	Line72_1;Line72_2;Line63_2;Line72_3;C1;C2;C3;S2	NOT_FOUND
2	13194046	13203383	9338	4	AX-77275994	NA	0.0403391	2	19	9	0.259661	0.340339	0.0666667	0.633333	0.3	Line72_1;Line72_2;Line63_1;Line72_3;C1;C2;C3;M4;S1;S2;S5_RCS	PARD3
2	17483746	17491972	8227	3	AX-76048009	rs315161145	-0.0918144	15	8	7	0.391814	0.208186	0.5	0.266667	0.233333	F1_67_3;F1_67_1;Line63_1;Line63_2;F1_67_2;Line72_3;Line63_3;C1;J1;J2;J3;M11;M4;M5;N1;N2;N3;S1;S5_RCS;X1;X3;X4	PIP4K2A
2	18325207	18333113	7907	3	AX-76049598	rs315508064	-0.0924822	15	1	14	0.392482	0.207518	0.5	0.0333333	0.466667	Line72_1;F1_67_1;Line72_2;Line63_1;Line63_2;F1_76_1;F1_67_2;Line72_3;Line63_3;F1_76_2;F1_76_3;C1;C2;C3;J1;J2;J3;M11;M4;M5;N1;N2;N3;S1;S2;S5_RCS;X1;X3;X4	NOT_FOUND
2	21483213	21489552	6340	3	AX-76055516	rs312335216	0.285133	0	18	12	0.0148672	0.585133	0	0.6	0.4	F1_67_3;Line72_1;F1_67_1;Line72_2;F1_76_1;F1_67_2;Line72_3;F1_76_2;F1_76_3;S1;S2;S5_RCS	NOT_FOUND
2	24883378	24890784	7407	3	AX-76060929	rs14153663	0.212601	0	19	11	0.0873992	0.512601	0	0.633333	0.366667	F1_67_3;Line72_1;F1_67_1;Line72_2;F1_76_1;F1_67_2;Line72_3;F1_76_2;F1_76_3;S1;S5_RCS	NOT_FOUND
2	27378708	27382081	3374	5	AX-80761304	rs13543505	0.180394	0	19	11	0.119606	0.480394	0	0.633333	0.366667	F1_67_3;Line72_1;F1_67_1;Line72_2;Line72_3;F1_76_2;N1;N2;N3;S1;S5_RCS	NOT_FOUND
2	27941042	27941955	914	3	AX-76066834	rs312832530	0.38392	1	15	14	0.0839202	0.68392	0.0333333	0.5	0.466667	F1_67_3;Line72_1;F1_67_1;Line72_2;F1_76_1;F1_67_2;Line72_3;F1_76_2;F1_76_3;N1;N2;N3;S1;S5_RCS;X3	NOT_FOUND
2	29133626	29137226	3601	3	AX-76069144	rs315575951	-0.130514	10	15	5	0.430514	0.169486	0.333333	0.5	0.166667	F1_67_3;Line72_1;F1_67_1;Line72_2;Line72_3;C1;C2;N1;N2;N3;S1;S2;S5_RCS;X1;X3	SNX13
2	31697296	31700670	3375	3	AX-76073745	rs15939217	-0.0629882	15	2	13	0.362988	0.237012	0.5	0.0666667	0.433333	F1_67_3;Line72_1;F1_67_1;Line72_2;Line63_1;Line63_2;F1_76_1;F1_67_2;Line72_3;Line63_3;F1_76_3;C1;C2;C3;J1;J2;J3;M11;M4;M5;N1;N2;N3;S1;S5_RCS;X1;X3;X4	NOT_FOUND
2	45916228	45920048	3821	3	AX-76097605	rs317617345	0.292053	0	19	11	0.00794696	0.592053	0	0.633333	0.366667	F1_67_3;Line72_1;F1_67_1;Line72_2;F1_76_1;F1_67_2;Line72_3;F1_76_2;F1_76_3;C2;C3	NOT_FOUND
2	53094118	53103357	9240	3	AX-76110296	rs313443882	-0.286468	9	21	0	0.586468	0.013532	0.3	0.7	0	Line72_1;Line72_2;Line63_1;Line63_2;F1_67_2;Line72_3;Line63_3;F1_76_2;M11	NOT_FOUND
2	60994052	61002556	8505	5	AX-76124296	rs314574170	-0.0931834	8	22	0	0.393183	0.206817	0.266667	0.733333	0	F1_67_3;Line72_1;F1_67_1;Line72_2;F1_76_1;F1_67_2;F1_76_2;F1_76_3	NOT_FOUND
2	63542218	63542529	312	3	AX-76128799	rs315961388	0.196956	0	20	10	0.103044	0.496956	0	0.666667	0.333333	F1_67_3;Line72_1;F1_67_1;Line72_2;F1_76_1;Line72_3;F1_76_3;S1;S2;S5_RCS	NOT_FOUND
2	66203486	66208805	5320	4	AX-76133870	rs313048022	0.049327	7	13	10	0.250673	0.349327	0.233333	0.433333	0.333333	Line72_1;Line72_2;Line63_1;Line63_2;Line72_3;Line63_3;C1;J1;M11;M4;M5;N2;N3;S1;S2;X1;X3	NOT_FOUND
2	67617325	67630627	13303	7	AX-76136540	rs315058972	-0.110981	15	0	15	0.410981	0.189019	0.5	0	0.5	F1_67_3;Line72_1;F1_67_1;Line72_2;Line63_1;Line63_2;F1_76_1;F1_67_2;Line72_3;Line63_3;F1_76_2;F1_76_3;C1;C2;C3;J1;J2;J3;M11;M4;M5;N1;N2;N3;S1;S2;S5_RCS;X1;X3;X4	NOT_FOUND
2	69574893	69579418	4526	4	AX-76140201	rs313179293	0.0996368	0	23	7	0.200363	0.399637	0	0.766667	0.233333	Line72_1;Line72_2;Line72_3;N2;S1;S2;S5_RCS	NOT_FOUND
2	74099026	74100933	1908	3	AX-80794126	rs315424097	-0.135702	6	24	0	0.435702	0.164298	0.2	0.8	0	Line72_1;Line72_2;Line72_3;S1;S2;S5_RCS	NOT_FOUND
2	79637945	79640027	2083	3	AX-76159179	rs80605621	-0.166871	7	23	0	0.466871	0.133129	0.233333	0.766667	0	F1_67_3;Line72_1;Line72_2;Line72_3;S1;S2;S5_RCS	NOT_FOUND
2	81592992	81594465	1474	3	AX-80861507	rs312612250	-0.336699	6	24	0	0.636699	0.036699	0.2	0.8	0	Line72_1;Line72_2;Line72_3;S1;S2;S5_RCS	NOT_FOUND
2	81952642	81962048	9407	5	AX-80844976	rs314405174	-0.393969	12	18	0	0.693969	0.0939686	0.4	0.6	0	F1_67_3;Line72_1;F1_67_1;Line72_2;F1_76_1;F1_67_2;Line72_3;F1_76_2;F1_76_3;S1;S2;S5_RCS	NOT_FOUND
2	83923245	83926792	3548	3	AX-80782963	rs15122032	0.188257	0	18	12	0.111743	0.488257	0	0.6	0.4	F1_67_3;Line72_1;F1_67_1;Line72_2;F1_76_1;F1_67_2;Line72_3;F1_76_2;F1_76_3;S1;S2;S5_RCS	NOT_FOUND
2	89340703	89342010	1308	3	AX-76176624	rs312447782	-0.130154	10	19	1	0.430154	0.169846	0.333333	0.633333	0.0333333	Line72_1;Line72_2;Line72_3;J1;M11;M4;M5;N2;S1;S2;S5_RCS	STX17
2	96880281	96884880	4600	3	AX-76190751	rs316268256	0.286475	0	17	13	0.0135251	0.586475	0	0.566667	0.433333	F1_67_3;Line72_1;F1_67_1;Line72_2;F1_76_1;F1_67_2;Line72_3;F1_76_2;F1_76_3;N1;N2;N3;X4	NOT_FOUND
2	99232341	99237524	5184	3	AX-76195277	rs14730422	0.10556	1	19	10	0.19444	0.40556	0.0333333	0.633333	0.333333	Line72_1;Line72_2;F1_76_1;F1_67_2;Line72_3;C1;C2;J3;N1;N2;N3	NOT_FOUND
2	112228565	112249425	20861	10	AX-75971383	rs14235664	-0.0482856	5	25	0	0.348286	0.251714	0.166667	0.833333	0	Line72_1;Line72_2;F1_67_2;Line72_3;F1_76_2	NOT_FOUND
2	115475473	115484664	9192	3	AX-75977438	rs13790964	-0.153485	6	24	0	0.453485	0.146515	0.2	0.8	0	Line72_1;Line72_2;Line72_3;N1;N2;N3	NOT_FOUND
2	116094599	116097298	2700	3	AX-75978518	rs16111498	-0.173253	6	24	0	0.473253	0.126747	0.2	0.8	0	Line72_1;Line72_2;Line72_3;N1;N2;N3	NOT_FOUND
2	117198674	117203115	4442	3	AX-75980559	rs314222506	0.178278	0	21	9	0.121722	0.478278	0	0.7	0.3	F1_67_3;Line72_1;F1_67_1;Line72_2;F1_76_1;F1_67_2;Line72_3;F1_76_2;F1_76_3	NOT_FOUND
2	128190612	128193349	2738	3	AX-76001691	rs315018353	0.167778	0	21	9	0.132222	0.467778	0	0.7	0.3	F1_67_3;Line72_1;F1_67_1;Line72_2;F1_76_1;F1_67_2;Line72_3;F1_76_2;F1_76_3	NOT_FOUND
2	131645888	131656397	10510	5	AX-76008532	rs314284694	0.155631	0	21	9	0.144369	0.455631	0	0.7	0.3	F1_67_3;Line72_1;F1_67_1;Line72_2;F1_76_1;F1_67_2;Line72_3;F1_76_2;F1_76_3	NOT_FOUND
3	11402054	11404387	2334	3	AX-76415413	rs314444595	0.236813	0	18	12	0.063187	0.536813	0	0.6	0.4	F1_67_3;Line72_1;F1_67_1;Line72_2;Line63_1;Line63_2;F1_76_1;F1_67_2;Line72_3;Line63_3;F1_76_2;F1_76_3	NOT_FOUND
3	14385591	14388946	3356	3	AX-76421335	rs15750009	0.330131	0	18	12	0.0301307	0.630131	0	0.6	0.4	F1_67_3;Line72_1;F1_67_1;Line72_2;F1_76_1;F1_67_2;Line72_3;F1_76_2;F1_76_3;M11;M4;M5	NOT_FOUND
3	40487477	40492578	5102	3	AX-76474866	rs14345041	0.28418	0	18	12	0.0158201	0.58418	0	0.6	0.4	F1_67_3;Line72_1;F1_67_1;Line72_2;F1_76_1;F1_67_2;Line72_3;F1_76_2;F1_76_3;C1;C2;C3	C3H6ORF120
3	43999153	44003340	4188	3	AX-76482605	rs15338633	-0.199168	6	24	0	0.499168	0.100832	0.2	0.8	0	Line72_1;Line72_2;Line72_3;C1;C2;C3	NOT_FOUND
3	47382284	47386885	4602	3	AX-80978335	rs314776005	-0.152409	15	1	14	0.452409	0.147591	0.5	0.0333333	0.466667	Line72_1;F1_67_1;Line72_2;Line63_1;Line63_2;F1_76_1;F1_67_2;Line72_3;Line63_3;F1_76_2;F1_76_3;C1;C2;C3;J1;J2;J3;M11;M4;M5;N1;N2;N3;S1;S2;S5_RCS;X1;X3;X4	NOT_FOUND
3	52027363	52029235	1873	3	AX-76499403	rs312463735	-0.153667	7	21	2	0.453667	0.146333	0.233333	0.7	0.0666667	F1_67_3;Line72_1;Line72_2;Line72_3;C3;N1;N2;N3;S2	NOT_FOUND
3	53309153	53311383	2231	3	AX-76502172	rs315351517	-0.185733	6	23	1	0.485733	0.114267	0.2	0.766667	0.0333333	Line72_1;Line72_2;Line72_3;M11;N1;N2;N3	NOT_FOUND
3	58645524	58649626	4103	3	AX-76513846	rs80681621	0.264379	0	18	12	0.0356214	0.564379	0	0.6	0.4	F1_67_3;Line72_1;F1_67_1;Line72_2;F1_76_1;F1_67_2;Line72_3;F1_76_2;F1_76_3;N1;N2;N3	NOT_FOUND
3	65741154	65741892	739	3	AX-76529232	rs318185264	0.18553	0	21	9	0.11447	0.48553	0	0.7	0.3	F1_67_3;Line72_1;F1_67_1;Line72_2;F1_76_1;F1_67_2;Line72_3;F1_76_2;F1_76_3	NOT_FOUND
3	71054635	71061948	7314	3	AX-76540543	rs312579233	-0.151146	9	15	6	0.451146	0.148854	0.3	0.5	0.2	F1_67_3;Line72_1;Line72_2;Line63_2;Line72_3;Line63_3;C1;C2;J1;J2;N1;N3;X1;X3;X4	NOT_FOUND
3	103706702	103709022	2321	3	AX-76398019	rs14407491	0.205604	0	18	12	0.0943965	0.505604	0	0.6	0.4	F1_67_3;Line72_1;F1_67_1;Line72_2;F1_76_1;F1_67_2;Line72_3;F1_76_2;F1_76_3;N1;N2;N3	NOT_FOUND
4	8197429	8204902	7474	4	AX-80765023	rs15487314	-0.260188	9	21	0	0.560188	0.0398121	0.3	0.7	0	F1_67_3;Line72_1;F1_67_1;Line72_2;F1_76_1;F1_67_2;Line72_3;F1_76_2;F1_76_3	NOT_FOUND
4	11133618	11134814	1197	3	AX-76605673	rs14428437	0.243129	0	20	10	0.0568709	0.543129	0	0.666667	0.333333	F1_67_3;Line72_1;F1_67_1;Line72_2;F1_76_1;F1_67_2;Line72_3;F1_76_2;F1_76_3;S5_RCS	NOT_FOUND
4	24987178	24987982	805	3	AX-76631082	rs13577552	-0.152542	11	19	0	0.452542	0.147458	0.366667	0.633333	0	Line72_1;F1_67_1;Line72_2;F1_76_1;F1_67_2;Line72_3;F1_76_2;F1_76_3;M11;M4;X3	NOT_FOUND
4	33230019	33233986	3968	3	AX-76647499	rs316680577	-0.198352	6	23	1	0.498352	0.101648	0.2	0.766667	0.0333333	Line72_1;Line72_2;Line63_2;Line72_3;M11;M4;M5	NOT_FOUND
4	35048801	35051870	3070	3	AX-76650914	rs316276779	-0.0770374	15	0	15	0.377037	0.222963	0.5	0	0.5	F1_67_3;Line72_1;F1_67_1;Line72_2;Line63_1;Line63_2;F1_76_1;F1_67_2;Line72_3;Line63_3;F1_76_2;F1_76_3;C1;C2;C3;J1;J2;J3;M11;M4;M5;N1;N2;N3;S1;S2;S5_RCS;X1;X3;X4	NOT_FOUND
4	37632444	37637897	5454	3	AX-76655634	rs315577921	-0.19353	8	20	2	0.49353	0.10647	0.266667	0.666667	0.0666667	F1_67_3;Line72_1;Line72_2;Line63_2;Line72_3;Line63_3;M11;M4;M5;X4	NOT_FOUND
4	44364752	44371305	6554	4	AX-76668637	rs313057509	-0.160401	10	18	2	0.460401	0.139599	0.333333	0.6	0.0666667	Line72_1;Line72_2;Line72_3;J3;M11;M4;M5;N1;S1;S2;S5_RCS;X4	NOT_FOUND
4	45505945	45527130	21186	7	AX-80796662	rs313728706	-0.107662	12	10	8	0.407662	0.192338	0.4	0.333333	0.266667	Line72_1;Line63_1;Line63_2;Line72_3;Line63_3;C1;C2;C3;J1;J2;J3;M11;M5;N1;N2;N3;S1;S2;S5_RCS;X4	NOT_FOUND
4	53314727	53317901	3175	3	AX-76685784	rs313582299	-0.273646	12	18	0	0.573646	0.026354	0.4	0.6	0	Line63_1;Line63_2;Line63_3;C1;C2;C3;J1;J2;J3;N1;N2;N3	TRPC3
4	61825685	61832148	6464	7	AX-80978471	rs316786632	-0.478072	8	17	5	0.778072	0.178072	0.266667	0.566667	0.166667	Line72_1;Line72_2;Line63_2;Line72_3;C1;C2;J3;N1;N3;S1;S2;S5_RCS;X1	NOT_FOUND
4	65529476	65533001	3526	3	AX-76710980	rs316741325	0.286361	0	18	12	0.0136385	0.586361	0	0.6	0.4	F1_67_3;Line72_1;F1_67_1;Line72_2;F1_76_1;F1_67_2;Line72_3;F1_76_2;F1_76_3;C1;C2;C3	NOT_FOUND
4	72330886	72336565	5680	3	AX-76724207	rs313389567	-0.0113896	15	3	12	0.31139	0.28861	0.5	0.1	0.4	F1_67_3;Line72_1;Line72_2;Line63_1;Line63_2;Line72_3;Line63_3;F1_76_2;F1_76_3;C1;C2;C3;J1;J2;J3;M11;M4;M5;N1;N2;N3;S1;S2;S5_RCS;X1;X3;X4	NOT_FOUND
4	88905580	88906840	1261	3	AX-76759736	rs316400332	-0.193802	6	24	0	0.493802	0.106198	0.2	0.8	0	Line72_1;Line72_2;Line72_3;C1;C2;C3	GFRA4
5	2060692	2065213	4522	3	AX-76795923	rs312820870	0.230514	0	18	12	0.0694857	0.530514	0	0.6	0.4	F1_67_3;Line72_1;F1_67_1;Line72_2;F1_76_1;F1_67_2;Line72_3;F1_76_2;F1_76_3;X1;X3;X4	NOT_FOUND
5	19630190	19707342	77153	33	AX-76792726	rs315426459	0.407469	0	21	9	0.107469	0.707469	0	0.7	0.3	F1_67_3;Line72_1;F1_67_1;Line72_2;F1_76_1;F1_67_2;Line72_3;F1_76_2;F1_76_3	NOT_FOUND
5	37045007	37047823	2817	3	AX-76830737	rs13586574	0.224048	0	21	9	0.0759518	0.524048	0	0.7	0.3	F1_67_3;Line72_1;F1_67_1;Line72_2;F1_76_1;F1_67_2;Line72_3;F1_76_2;F1_76_3	LIN52
5	50398435	50400932	2498	3	AX-76860187	rs14547769	-0.147507	7	20	3	0.447507	0.152493	0.233333	0.666667	0.1	F1_67_3;Line72_1;Line72_2;Line63_2;Line72_3;C1;J1;J2;J3;S1	NOT_FOUND
5	50630949	50634185	3237	4	AX-76860783	rs312626816	-0.234365	8	17	5	0.534365	0.0656351	0.266667	0.566667	0.166667	F1_67_3;Line72_1;Line72_2;F1_76_1;Line72_3;J1;J2;J3;M11;N1;N3;S2;S5_RCS	NOT_FOUND
5	51037797	51039574	1778	3	AX-76861839	rs316015205	-0.166026	11	16	3	0.466026	0.133974	0.366667	0.533333	0.1	Line63_1;Line63_2;Line72_3;Line63_3;C1;C2;C3;M11;M4;M5;N1;S5_RCS;X3;X4	NOT_FOUND
6	3583897	3588873	4977	3	AX-76956725	rs315515515	0.249044	0	18	12	0.050956	0.549044	0	0.6	0.4	F1_67_3;Line72_1;F1_67_1;Line72_2;F1_76_1;F1_67_2;Line72_3;F1_76_2;F1_76_3;J1;J2;J3	NOT_FOUND
6	8495650	8497381	1732	3	AX-76969665	rs14571551	0.21093	0	18	12	0.0890704	0.51093	0	0.6	0.4	F1_67_3;Line72_1;F1_67_1;Line72_2;F1_76_1;F1_67_2;Line72_3;F1_76_2;F1_76_3;C1;C2;C3	ANK3
6	18893007	18896129	3123	3	AX-76914649	rs317363742	-0.167678	10	18	2	0.467678	0.132322	0.333333	0.6	0.0666667	F1_67_3;Line72_1;F1_67_1;Line72_2;Line63_1;F1_76_1;F1_67_2;Line72_3;F1_76_2;F1_76_3;J3;X4	NOT_FOUND
6	25023454	25024774	1321	3	AX-76930034	rs317499938	0.224367	0	21	9	0.0756328	0.524367	0	0.7	0.3	F1_67_3;Line72_1;F1_67_1;Line72_2;F1_76_1;F1_67_2;Line72_3;F1_76_2;F1_76_3	NOT_FOUND
6	27335759	27338317	2559	3	AX-80947753	rs315544362	0.236337	0	17	13	0.063663	0.536337	0	0.566667	0.433333	Line72_1;F1_67_1;Line72_2;F1_76_1;F1_67_2;Line72_3;F1_76_2;F1_76_3;C1;J1;J2;J3;M11	NOT_FOUND
6	30528784	30529261	478	3	AX-80793821	rs317171937	0.279544	0	21	9	0.0204561	0.579544	0	0.7	0.3	F1_67_3;Line72_1;F1_67_1;Line72_2;F1_76_1;F1_67_2;Line72_3;F1_76_2;F1_76_3	NOT_FOUND
7	965648	968146	2499	3	AX-76973338	rs316248343	-0.32252	8	22	0	0.62252	0.0225202	0.266667	0.733333	0	F1_67_3;Line72_1;Line72_2;Line72_3;F1_76_2;X1;X3;X4	NOT_FOUND
7	23458778	23461517	2740	3	AX-77008409	rs314643194	0.284921	0	18	12	0.0150785	0.584921	0	0.6	0.4	F1_67_3;Line72_1;F1_67_1;Line72_2;F1_76_1;F1_67_2;Line72_3;F1_76_2;F1_76_3;M11;M4;M5	NOT_FOUND
8	4018141	4022302	4162	3	AX-80818971	rs314350461	0.254895	0	18	12	0.0451051	0.554895	0	0.6	0.4	F1_67_3;Line72_1;F1_67_1;Line72_2;F1_76_1;F1_67_2;Line72_3;F1_76_2;F1_76_3;X1;X3;X4	MTA1
8	6733234	6735046	1813	3	AX-77116106	rs317271047	0.332419	0	20	10	0.0324191	0.632419	0	0.666667	0.333333	F1_67_3;Line72_1;F1_67_1;Line72_2;F1_76_1;F1_67_2;Line72_3;F1_76_2;F1_76_3;X1	NOT_FOUND
8	7390267	7394147	3881	3	AX-77117826	rs16624862	0.191449	1	16	13	0.108551	0.491449	0.0333333	0.533333	0.433333	F1_67_3;Line72_1;F1_67_1;Line72_2;F1_76_1;F1_67_2;Line72_3;F1_76_2;F1_76_3;J1;J2;J3;S5_RCS;X1	NOT_FOUND
8	8858422	8861361	2940	3	AX-77121269	rs15908463	0.429657	0	17	13	0.129657	0.729657	0	0.566667	0.433333	F1_67_3;Line72_1;F1_67_1;Line72_2;F1_76_1;F1_67_2;Line72_3;F1_76_2;F1_76_3;J1;J2;J3;X1	NOT_FOUND
8	12544930	12550187	5258	3	AX-77062700	rs316007631	-0.153749	7	23	0	0.453749	0.146251	0.233333	0.766667	0	F1_67_3;Line72_1;Line72_2;Line72_3;F1_76_2;X1;X4	ARHGAP29
8	15478635	15479644	1010	3	AX-77070647	rs316120361	0.212531	0	21	9	0.0874689	0.512531	0	0.7	0.3	F1_67_3;Line72_1;F1_67_1;Line72_2;F1_76_1;F1_67_2;Line72_3;F1_76_2;F1_76_3	NOT_FOUND
8	19441984	19443160	1177	3	AX-77081138	rs312677526	-0.222247	10	16	4	0.522247	0.0777529	0.333333	0.533333	0.133333	F1_67_3;Line72_1;Line72_2;Line63_2;Line72_3;Line63_3;C1;C2;C3;J1;J2;J3;X1;X3	NOT_FOUND
8	20149924	20152751	2828	3	AX-77082956	rs317837505	0.398838	0	16	14	0.0988377	0.698838	0	0.533333	0.466667	F1_67_3;Line72_1;F1_67_1;Line72_2;F1_76_1;F1_67_2;Line72_3;F1_76_2;F1_76_3;C2;C3;J1;J2;J3	RTBDN
8	21933183	21935505	2323	3	AX-77087565	rs315936439	-0.00509857	13	5	12	0.305099	0.294901	0.433333	0.166667	0.4	Line72_1;F1_67_1;Line63_1;Line63_2;F1_76_1;F1_67_2;Line72_3;Line63_3;F1_76_2;F1_76_3;C1;C3;J1;J2;J3;M11;M5;N1;N2;N3;S1;S2;S5_RCS;X1;X4	NOT_FOUND
8	23999201	24002656	3456	3	AX-77093126	rs14654513	0.153299	0	20	10	0.146701	0.453299	0	0.666667	0.333333	F1_67_3;Line72_1;F1_67_1;Line72_2;F1_67_2;Line72_3;F1_76_3;C1;C2;C3	YIPF1
9	1643710	1647341	3632	3	AX-77146074	rs13741586	-0.170965	9	21	0	0.470965	0.129035	0.3	0.7	0	F1_67_3;Line72_1;F1_67_1;Line72_2;F1_76_1;F1_67_2;Line72_3;F1_76_2;F1_76_3	NOT_FOUND
9	2782555	2783293	739	3	AX-77167374	rs315888600	0.592497	0	21	9	0.292497	0.892497	0	0.7	0.3	F1_67_3;Line72_1;F1_67_1;Line72_2;F1_76_1;F1_67_2;Line72_3;F1_76_2;F1_76_3	NOT_FOUND
9	4305308	4307034	1727	3	AX-77171562	rs312484824	0.199555	0	21	9	0.100445	0.499555	0	0.7	0.3	F1_67_3;Line72_1;F1_67_1;Line72_2;F1_76_1;F1_67_2;Line72_3;F1_76_2;F1_76_3	NOT_FOUND
9	7125698	7126991	1294	4	AX-77179485	rs316776192	0.17576	0	19	11	0.12424	0.47576	0	0.633333	0.366667	F1_67_3;Line72_1;F1_67_1;Line72_2;F1_76_1;F1_67_2;Line72_3;F1_76_2;F1_76_3;C1;C3	EPHA4
9	8133230	8138012	4783	6	AX-77182430	rs316768759	0.504105	0	20	10	0.204105	0.804105	0	0.666667	0.333333	F1_67_3;Line72_1;F1_67_1;Line72_2;F1_76_1;F1_67_2;Line72_3;F1_76_2;F1_76_3;C3	NOT_FOUND
9	10205150	10208728	3579	3	AX-80971750	rs312371507	0.32	0	20	10	0.02	0.62	0	0.666667	0.333333	F1_67_3;Line72_1;F1_67_1;Line72_2;F1_76_1;F1_67_2;Line72_3;F1_76_2;F1_76_3;C3	SLC9A9
9	11820416	11822665	2250	3	AX-77129568	rs318165749	-0.191666	10	20	0	0.491666	0.108334	0.333333	0.666667	0	F1_67_3;Line72_1;F1_67_1;Line72_2;F1_76_1;F1_67_2;Line72_3;F1_76_2;F1_76_3;C3	NOT_FOUND
9	21608185	21609621	1437	3	AX-77160138	rs315908177	0.202193	0	19	11	0.097807	0.502193	0	0.633333	0.366667	F1_67_3;Line72_1;F1_67_1;Line72_2;F1_76_1;F1_67_2;Line72_3;F1_76_2;F1_76_3;M11;S2	KPNA4
10	2415158	2417564	2407	3	AX-75605205	rs316984128	0.199359	1	20	9	0.100641	0.499359	0.0333333	0.666667	0.3	F1_67_3;Line72_1;F1_67_1;Line72_2;F1_76_1;F1_67_2;Line72_3;F1_76_2;F1_76_3;S5_RCS	NOT_FOUND
10	2783703	2785370	1668	3	AX-75606260	rs15562756	0.160578	0	21	9	0.139422	0.460578	0	0.7	0.3	F1_67_3;Line72_1;F1_67_1;Line72_2;F1_76_1;F1_67_2;Line72_3;F1_76_2;F1_76_3	NOT_FOUND
10	5716844	5717897	1054	3	AX-80866749	rs316993919	-0.115819	3	27	0	0.415819	0.184181	0.1	0.9	0	Line72_1;Line72_2;Line72_3	NOT_FOUND
10	11886123	11889075	2953	3	AX-75575191	rs317347620	0.265954	0	20	10	0.0340456	0.565954	0	0.666667	0.333333	F1_67_3;Line72_1;F1_67_1;Line72_2;F1_67_2;Line72_3;F1_76_3;J1;J2;J3	NOT_FOUND
10	13574322	13588198	13877	11	AX-75581217	rs312904584	0.128224	0	20	10	0.171776	0.428224	0	0.666667	0.333333	Line72_1;F1_67_1;Line72_2;F1_76_1;F1_67_2;Line72_3;F1_76_3;J1;J2;J3	NOT_FOUND
11	4962435	4965379	2945	5	AX-75663516	rs316509386	0.427986	0	18	12	0.127986	0.727986	0	0.6	0.4	F1_67_3;Line72_1;F1_67_1;Line72_2;F1_76_1;F1_67_2;Line72_3;F1_76_2;F1_76_3;J1;J2;J3	NOT_FOUND
11	5657515	5660005	2491	3	AX-75665545	rs316016050	-0.228925	6	22	2	0.528925	0.0710754	0.2	0.733333	0.0666667	Line72_1;Line72_2;Line72_3;C3;J1;J2;J3;S2	NOT_FOUND
11	9381176	9383294	2119	3	AX-75676702	rs316213733	-0.222126	3	27	0	0.522126	0.0778737	0.1	0.9	0	N1;N2;N3	ANKRD27
11	12282002	12284898	2897	4	AX-75635466	rs312522940	-0.437893	6	24	0	0.737893	0.137893	0.2	0.8	0	Line72_1;Line72_2;Line72_3;J1;J2;J3	NOT_FOUND
12	1653805	1655994	2190	3	AX-75697216	rs317223672	0.0685107	13	4	13	0.231489	0.368511	0.433333	0.133333	0.433333	Line72_1;F1_67_1;Line72_2;Line63_1;Line63_2;F1_76_1;F1_67_2;Line72_3;Line63_3;F1_76_3;C1;C2;J1;J2;J3;M11;M5;N1;N2;N3;S1;S2;S5_RCS;X1;X3;X4	NOT_FOUND
12	7014730	7016642	1913	3	AX-75721474	rs313151960	0.315094	0	18	12	0.0150943	0.615094	0	0.6	0.4	F1_67_3;Line72_1;F1_67_1;Line72_2;F1_76_1;F1_67_2;Line72_3;F1_76_2;F1_76_3;J1;J2;J3	NOT_FOUND
12	9227111	9228379	1269	3	AX-75728147	rs314123511	0.00108318	8	13	9	0.298917	0.301083	0.266667	0.433333	0.3	F1_67_3;Line72_1;F1_67_1;Line72_2;F1_76_1;F1_67_2;Line72_3;F1_76_2;F1_76_3;C2;J1;J2;J3;N3;X1;X3;X4	NOT_FOUND
12	16762331	16765740	3410	3	AX-75698130	rs314901564	-0.23336	12	16	2	0.53336	0.06664	0.4	0.533333	0.0666667	Line72_2;Line63_1;Line63_2;Line63_3;C1;C2;C3;J1;J2;J3;M4;S1;S2;S5_RCS	NOT_FOUND
12	17654710	17655775	1066	3	AX-75700862	rs315953726	-0.184227	9	18	3	0.484227	0.115773	0.3	0.6	0.1	Line72_1;Line72_2;Line72_3;Line63_3;C1;M11;M4;M5;N1;N2;N3;S5_RCS	NOT_FOUND
13	2612322	2615701	3380	3	AX-75751800	rs312590316	-0.185126	10	20	0	0.485126	0.114874	0.333333	0.666667	0	F1_67_3;Line72_1;Line72_2;F1_67_2;Line72_3;F1_76_2;F1_76_3;X1;X3;X4	FGF18
13	4381681	4384216	2536	3	AX-75756108	rs14054022	0.274913	0	18	12	0.0250865	0.574913	0	0.6	0.4	F1_67_3;Line72_1;F1_67_1;Line72_2;F1_76_1;F1_67_2;Line72_3;F1_76_2;F1_76_3;N1;N2;N3	ODZ2
13	6911058	6912021	964	3	AX-75762798	rs313651403	-0.217854	10	20	0	0.517854	0.0821464	0.333333	0.666667	0	Line63_1;Line63_2;Line63_3;J1;J2;J3;M4;X1;X3;X4	NOT_FOUND
13	13568015	13573061	5047	3	AX-75739271	rs315550125	-0.229567	9	21	0	0.529567	0.0704328	0.3	0.7	0	Line72_1;Line72_2;Line72_3;J1;J2;J3;N1;N2;N3	NOT_FOUND
13	15077237	15080554	3318	3	AX-75743370	rs312692330	-0.27707	13	17	0	0.57707	0.0229298	0.433333	0.566667	0	F1_67_3;Line63_1;Line63_2;Line63_3;C2;C3;M11;S1;S2;S5_RCS;X1;X3;X4	NOT_FOUND
13	15838781	15842904	4124	3	AX-75745370	rs317028344	0.139549	4	14	12	0.160451	0.439549	0.133333	0.466667	0.4	Line72_1;Line72_2;Line63_1;Line63_2;Line63_3;C1;C2;J3;M11;N2;S1;S2;S5_RCS;X1;X3;X4	NOT_FOUND
14	911395	918491	7097	9	AX-75811879	rs313299955	-0.0660916	9	21	0	0.366092	0.233908	0.3	0.7	0	F1_67_3;F1_67_1;Line72_2;F1_76_1;F1_67_2;F1_76_2;F1_76_3;C1;C3	NOT_FOUND
14	2723689	2724230	542	3	AX-80777711	rs316294062	0.138217	0	21	9	0.161783	0.438217	0	0.7	0.3	F1_67_3;Line72_1;F1_67_1;Line72_2;F1_76_1;F1_67_2;Line72_3;F1_76_2;F1_76_3	NOT_FOUND
14	3538642	3540054	1413	3	AX-75793869	rs317125197	0.108148	0	21	9	0.191852	0.408148	0	0.7	0.3	F1_67_3;Line72_1;F1_67_1;Line72_2;F1_76_1;F1_67_2;Line72_3;F1_76_2;F1_76_3	SDK1
14	4922476	4924486	2011	3	AX-75798183	rs316478520	0.173282	0	21	9	0.126718	0.473282	0	0.7	0.3	F1_67_3;Line72_1;F1_67_1;Line72_2;F1_76_1;F1_67_2;Line72_3;F1_76_2;F1_76_3	TOM1L2
14	12483119	12485513	2395	3	AX-75778668	rs313431603	-0.051297	9	19	2	0.351297	0.248703	0.3	0.633333	0.0666667	F1_67_3;Line72_1;F1_67_1;Line72_2;F1_76_1;F1_67_2;Line72_3;F1_76_2;F1_76_3;M11;S2	TRAP1
14	14311302	14314742	3441	4	AX-75784866	rs312620540	-0.0434024	6	24	0	0.343402	0.256598	0.2	0.8	0	F1_67_3;F1_67_1;F1_76_1;F1_67_2;F1_76_2;F1_76_3	NOT_FOUND
15	2434714	2436726	2013	3	AX-75827914	rs15765118	0.234774	1	17	12	0.0652256	0.534774	0.0333333	0.566667	0.4	F1_67_3;Line72_1;F1_67_1;Line72_2;F1_76_1;F1_67_2;Line72_3;F1_76_2;F1_76_3;J1;J2;J3;N2	NOT_FOUND
15	4393572	4395700	2129	3	AX-75833898	rs15019669	0.191146	0	16	14	0.108854	0.491146	0	0.533333	0.466667	F1_67_3;Line72_1;F1_67_1;Line72_2;F1_76_1;F1_67_2;Line72_3;F1_76_2;F1_76_3;J1;J2;J3;N2;N3	NOT_FOUND
17	680469	684672	4204	3	AX-75881373	rs316655424	0.242895	2	15	13	0.057105	0.542895	0.0666667	0.5	0.433333	Line72_1;F1_67_1;Line72_2;Line63_1;F1_76_1;F1_67_2;Line72_3;Line63_3;F1_76_2;F1_76_3;C1;C2;C3;M11;M4	NOT_FOUND
17	1433312	1438970	5659	11	AX-75856061	rs316558912	-0.0827143	11	19	0	0.382714	0.217286	0.366667	0.633333	0	F1_67_3;Line72_1;F1_67_1;Line72_2;F1_76_1;Line72_3;F1_76_2;F1_76_3;C1;C2;C3	POLE3
17	4305280	4307863	2584	3	AX-75865334	rs15800176	-0.248598	5	25	0	0.548598	0.0514023	0.166667	0.833333	0	Line72_1;F1_67_1;Line72_2;Line72_3;F1_76_3	NOT_FOUND
17	7100919	7102218	1300	3	AX-75875017	rs315901183	-0.179412	6	24	0	0.479412	0.120588	0.2	0.8	0	Line72_1;Line72_2;Line72_3;C1;C2;C3	VAV2
18	365572	370574	5003	3	AX-75895707	rs316975561	-0.357031	6	24	0	0.657031	0.0570313	0.2	0.8	0	Line72_1;Line72_2;Line72_3;J1;J2;J3	NOT_FOUND
18	994074	996667	2594	4	AX-75917459	rs14106087	0.26282	0	18	12	0.0371798	0.56282	0	0.6	0.4	F1_67_3;Line72_1;F1_67_1;Line72_2;F1_76_1;F1_67_2;Line72_3;F1_76_2;F1_76_3;J1;J2;J3	NOT_FOUND
18	8151630	8153791	2162	3	AX-75910208	rs316741447	0.447963	0	18	12	0.147963	0.747963	0	0.6	0.4	F1_67_3;Line72_1;F1_67_1;Line72_2;F1_76_1;F1_67_2;Line72_3;F1_76_2;F1_76_3;J1;J2;J3	NOT_FOUND
19	570335	570544	210	3	AX-75936199	rs14115337	0.18239	0	19	11	0.11761	0.48239	0	0.633333	0.366667	Line72_1;F1_67_1;Line72_2;F1_76_1;F1_67_2;Line72_3;F1_76_2;F1_76_3;S1;S2;S5_RCS	NOT_FOUND
19	3266850	3271865	5016	4	AX-75926062	rs15841808	-0.15391	10	19	1	0.45391	0.14609	0.333333	0.633333	0.0333333	F1_67_3;Line72_1;F1_67_1;Line72_2;F1_76_1;F1_67_2;Line72_3;F1_76_2;F1_76_3;C3;S5_RCS	NOT_FOUND
19	5697727	5700118	2392	5	AX-75934391	rs314053840	0.112768	0	22	8	0.187232	0.412768	0	0.733333	0.266667	F1_67_3;Line72_1;F1_67_1;Line72_2;F1_76_1;Line72_3;F1_76_2;F1_76_3	NOT_FOUND
20	5623377	5623896	520	3	AX-76219273	rs312612065	0.171143	0	21	9	0.128857	0.471143	0	0.7	0.3	F1_67_3;Line72_1;F1_67_1;Line72_2;F1_76_1;F1_67_2;Line72_3;F1_76_2;F1_76_3	NOT_FOUND
20	9453827	9456188	2362	3	AX-76229758	rs16170670	0.200954	0	22	8	0.0990464	0.500954	0	0.733333	0.266667	Line72_1;F1_67_1;Line72_2;F1_76_1;F1_67_2;Line72_3;F1_76_2;F1_76_3	NOT_FOUND
21	1182453	1184259	1807	3	AX-76232580	rs314249945	0.287083	0	18	12	0.0129165	0.587083	0	0.6	0.4	F1_67_3;Line72_1;F1_67_1;Line72_2;F1_76_1;F1_67_2;Line72_3;F1_76_2;F1_76_3;J1;J2;J3	NOT_FOUND
21	1403344	1404195	852	3	AX-76233495	rs313115197	0.192029	0	18	12	0.107971	0.492029	0	0.6	0.4	F1_67_3;Line72_1;F1_67_1;Line72_2;F1_76_1;F1_67_2;Line72_3;F1_76_2;F1_76_3;J1;J2;J3	NOT_FOUND
21	2034351	2035084	734	3	AX-76236423	rs316547018	0.295503	0	18	12	0.00449688	0.595503	0	0.6	0.4	F1_67_3;Line72_1;F1_67_1;Line72_2;F1_76_1;F1_67_2;Line72_3;F1_76_2;F1_76_3;J1;J2;J3	NOT_FOUND
21	3411980	3413099	1120	3	AX-76242160	rs14283839	0.301306	1	17	12	0.00130562	0.601306	0.0333333	0.566667	0.4	F1_67_3;Line72_1;F1_67_1;Line72_2;F1_76_1;F1_67_2;Line72_3;Line63_3;F1_76_2;F1_76_3;C1;C2;C3	NOT_FOUND
21	6138558	6138887	330	3	AX-76254838	rs312563504	-0.186075	13	16	1	0.486075	0.113925	0.433333	0.533333	0.0333333	F1_67_3;Line72_1;F1_67_1;Line72_2;F1_76_1;F1_67_2;Line72_3;F1_76_2;F1_76_3;C1;C2;C3;N3;S5_RCS	NOT_FOUND
22	3134789	3136045	1257	3	AX-76267600	rs15190781	0.203666	1	20	9	0.0963335	0.503666	0.0333333	0.666667	0.3	F1_67_3;Line72_1;F1_67_1;Line72_2;F1_76_1;F1_67_2;Line72_3;F1_76_2;F1_76_3;S5_RCS	NOT_FOUND
23	1559320	1560595	1276	3	AX-76278047	rs315279034	-0.215325	9	21	0	0.515325	0.0846755	0.3	0.7	0	F1_67_3;Line72_1;Line72_2;Line72_3;J2;J3;N1;N2;N3	HNRNPR
23	3876153	3877588	1436	3	AX-76288028	rs16020628	-0.235499	10	19	1	0.535499	0.0645007	0.333333	0.633333	0.0333333	F1_67_3;Line72_1;F1_67_1;F1_76_1;F1_67_2;Line72_3;F1_76_2;F1_76_3;N1;N2;N3	NOT_FOUND
24	2644882	2646648	1767	3	AX-76304925	rs314659447	0.181099	1	20	9	0.118901	0.481099	0.0333333	0.666667	0.3	F1_67_3;Line72_1;F1_67_1;Line72_2;Line63_1;F1_76_1;F1_67_2;Line72_3;F1_76_2;F1_76_3	NOT_FOUND
24	2704965	2707083	2119	3	AX-76305184	rs14294418	-0.114695	11	12	7	0.414695	0.185305	0.366667	0.4	0.233333	F1_67_3;Line72_1;F1_67_1;Line72_2;F1_76_1;F1_67_2;Line72_3;Line63_3;F1_76_2;C1;C3;J1;J2;M4;N3;S1;S2;X3	NOT_FOUND
24	3986713	3987711	999	3	AX-76310664	rs312853872	0.271297	0	21	9	0.0287032	0.571297	0	0.7	0.3	F1_67_3;Line72_1;F1_67_1;Line72_2;F1_76_1;F1_67_2;Line72_3;F1_76_2;F1_76_3	NOT_FOUND
24	4917133	4919078	1946	3	AX-76314626	rs314927954	-0.0105762	11	9	10	0.310576	0.289424	0.366667	0.3	0.333333	Line72_1;Line63_1;Line63_2;F1_76_1;Line63_3;C1;C2;C3;J1;J2;J3;M11;M4;N1;N2;N3;S1;S2;S5_RCS;X1;X3	NOT_FOUND
26	1045961	1046261	301	3	AX-76330964	rs315343349	0.168858	0	21	9	0.131142	0.468858	0	0.7	0.3	F1_67_3;Line72_1;F1_67_1;Line72_2;F1_76_1;F1_67_2;Line72_3;F1_76_2;F1_76_3	CEPT1
26	1738952	1741356	2405	3	AX-76333495	rs317162869	-0.0794508	8	17	5	0.379451	0.220549	0.266667	0.566667	0.166667	F1_67_3;F1_67_1;Line72_2;F1_76_1;F1_67_2;Line72_3;F1_76_2;F1_76_3;C3;J1;M5;N3;X4	NOT_FOUND
26	1927477	1931663	4187	5	AX-76334360	rs315218392	-0.0946282	3	27	0	0.394628	0.205372	0.1	0.9	0	Line72_1;Line72_2;Line72_3	CNTN2
26	4453343	4459888	6546	17	AX-76346097	rs317820417	0.0832829	0	24	6	0.216717	0.383283	0	0.8	0.2	Line72_1;Line72_2;F1_76_1;F1_67_2;Line72_3;F1_76_3	NOT_FOUND
26	4650615	4652593	1979	3	AX-76346992	rs14301134	0.254404	0	20	10	0.0455958	0.554404	0	0.666667	0.333333	F1_67_3;Line72_1;F1_67_1;Line72_2;F1_76_1;F1_67_2;Line72_3;F1_76_2;F1_76_3;S5_RCS	BAK1
27	1708135	1716062	7928	5	AX-80760661	rs316712560	-0.111624	8	22	0	0.411624	0.188376	0.266667	0.733333	0	Line72_1;F1_67_1;Line72_2;F1_76_1;F1_67_2;Line72_3;F1_76_2;F1_76_3	NOT_FOUND
27	4377267	4380494	3228	3	AX-76366526	rs312907731	0.148215	0	22	8	0.151785	0.448215	0	0.733333	0.266667	F1_67_3;Line72_1;F1_67_1;Line72_2;F1_76_1;F1_67_2;Line72_3;F1_76_3	NOT_FOUND
28	1295088	1296872	1785	3	AX-76372050	rs315332095	-0.20088	10	20	0	0.50088	0.0991201	0.333333	0.666667	0	F1_67_3;Line72_1;F1_67_1;Line72_2;F1_76_1;Line72_3;F1_76_2;S1;S2;S5_RCS	NOT_FOUND
28	2052433	2053835	1403	4	AX-76375297	rs313703705	-0.120019	9	21	0	0.420019	0.179981	0.3	0.7	0	F1_67_3;Line72_1;F1_67_1;Line72_2;F1_76_1;F1_67_2;Line72_3;F1_76_2;F1_76_3	NOT_FOUND
28	4376893	4378173	1281	3	AX-76386166	rs316304774	0.195671	0	21	9	0.104329	0.495671	0	0.7	0.3	F1_67_3;Line72_1;F1_67_1;Line72_2;F1_76_1;F1_67_2;Line72_3;F1_76_2;F1_76_3	NOT_FOUND
