# Supplementary material for: Characterization of Copy Number Variation’s Potential Role in Marek’s Disease
Source: Int J Mol Sci. 2017 May 9;18(5):1020. doi: 10.3390/ijms18051020 (PMC5454933; doi:10.3390/ijms18051020)
Supplement: Supplementary file 1 [file ijms-18-01020-s001.zip › Table S2.xlsx]

## Sheet: Sheet1
CNV	Primer	Sequence
CNV1	10_5716936_L	TGTGGGATTTGGATTCTAGCCTGT
	10_5716936_R	TGTAACACCAGAAGGTGGGAGTCA
CNV1	10_5717897_L	TCAGGACTTGGGATTTTTGAATGG
	10_5717897_R	GTCTGGAAGACCGTTAGCTCCAAG
CNV2	26_1928172_L	TGGATAGCACTTTCCCCGTTTCTA
	26_1928172_R	CCTCTTTCATCTCAGACCCCACTC
CNV2	26_1931474_L	GTTCCGATATCCCATTTCCACCTT
	26_1931474_R	GTGGGGAGAAGGCATCACAGAATA
