# Supplementary material for: Characterization of Copy Number Variation’s Potential Role in Marek’s Disease
Source: Int J Mol Sci. 2017 May 9;18(5):1020. doi: 10.3390/ijms18051020 (PMC5454933; doi:10.3390/ijms18051020)
Supplement: Supplementary file 1 [file ijms-18-01020-s001.zip › Table S3.xlsx]

## Sheet: Spleen
Ensembl Gene ID	Ensembl Transcript ID	Chr	Gene Start (bp)	Gene End (bp)	Transcript Start (bp)	Transcript End (bp)	RefGene Name	ENS	Line 63	Line 72
ENSGALG00000003849	ENSGALT00000006114	10	5146745	5227651	5146745	5227651	TRPM1	ENSGALG00000003849	0.456259	1.16007
ENSGALG00000003883	ENSGALT00000006179	10	5235131	5266963	5235131	5266963	MTMR10	ENSGALG00000003883	2.71749	2.67358
ENSGALG00000003897	ENSGALT00000006194	10	5271368	5286793	5271368	5286793	FAN1	ENSGALG00000003897	2.1779	2.16737
ENSGALG00000003906	ENSGALT00000006206	10	5287520	5294206	5287520	5294206	MPHOSPH10	ENSGALG00000003906	2.32686	2.35883
ENSGALG00000003913	ENSGALT00000034521	10	5299493	5303542	5299493	5303542	MCEE	ENSGALG00000003913	1.72817	1.58221
ENSGALG00000003930	ENSGALT00000006262	10	5356027	5394968	5356027	5394968	APBA2	ENSGALG00000003930	1.65131	1.54272
ENSGALG00000003944	ENSGALT00000006290	10	5396943	5466890	5396943	5466890	FAM189A1	ENSGALG00000003944	1.13709	1.3108
ENSGALG00000003970	ENSGALT00000034518	10	5524064	5593805	5524064	5593805	TJP1	ENSGALG00000003970	2.79991	2.72031
ENSGALG00000003985	ENSGALT00000006347	10	5713843	5728886	5713843	5728886	TARSL2	ENSGALG00000003985	2.23931	2.32502
CNV1	Deletion	10	5716844	5717897
ENSGALG00000026271	ENSGALT00000006419	10	5730113	5734914	5730113	5734914	TM2D3	ENSGALG00000026271	2.26215	2.02897	*
ENSGALG00000004038	ENSGALT00000039368	10	5735057	5743901	5735057	5743901	ADAL	ENSGALG00000004038	1.66133	1.42517
ENSGALG00000004046	ENSGALT00000006440	10	5747497	5754751	5747497	5754751	LARP6	ENSGALG00000004046	1.83465	1.66898
ENSGALG00000004059	ENSGALT00000006457	10	5755975	5794821	5755975	5794821	LRRC49	ENSGALG00000004059	0.820561	0.888608
ENSGALG00000004087	ENSGALT00000006501	10	5850094	6086027	5850094	6086027	THSD4	ENSGALG00000004087	2.08244	2.08798
ENSGALG00000004096	ENSGALT00000006519	10	6156717	6199170	6156717	6199170	CHRNA7	ENSGALG00000004096	0.787668	1.27174
ENSGALG00000004103	ENSGALT00000006527	10	6216548	6227549	6216548	6227549	FAM81A	ENSGALG00000004103	0.639988	1.28141
*significant after FDR correction
ENSGALG00000000587	ENSGALT00000000819	26	1676675	1717188	1676675	1717188	PLEKHA6	ENSGALG00000000587	2.11283	2.01231
ENSGALG00000000611	ENSGALT00000000864	26	1725757	1731836	1725757	1731836	PPP1R15B	ENSGALG00000000611	2.7086	2.63093
ENSGALG00000000623	ENSGALT00000000884	26	1732339	1747306	1732339	1747306	PIK3C2B	ENSGALG00000000623	2.97453	3.03799
ENSGALG00000000636	ENSGALT00000000908	26	1759929	1772232	1759929	1772232	MDM4	ENSGALG00000000636	2.51292	2.54586
ENSGALG00000000644	ENSGALT00000035237	26	1841734	1918228	1841734	1918228	NFASC	ENSGALG00000000644	1.44226	1.43688
ENSGALG00000000644	ENSGALT00000000917	26	1841734	1918228	1841734	1918228	NFASC	ENSGALG00000000644	1.44226	1.43688
ENSGALG00000000644	ENSGALT00000000916	26	1841734	1918228	1841734	1918228	NFASC	ENSGALG00000000644	1.44226	1.43688
ENSGALG00000000644	ENSGALT00000040537	26	1841734	1918228	1841734	1918228	NFASC	ENSGALG00000000644	1.44226	1.43688
ENSGALG00000000644	ENSGALT00000040544	26	1841734	1918228	1841734	1918228	NFASC	ENSGALG00000000644	1.44226	1.43688
ENSGALG00000000653	ENSGALT00000000928	26	1920859	1944417	1920859	1944417	CNTN2	ENSGALG00000000653	0.162718	0.0258358
CNV2	Deletion		1927477	1931663
ENSGALG00000000668	ENSGALT00000000943	26	1956516	1964897	1956516	1964897	RBBP5	ENSGALG00000000668	2.68133	2.65229
ENSGALG00000000670	ENSGALT00000035232	26	1967745	1987562	1967745	1987562	DSTYK	ENSGALG00000000670	2.07697	2.19981
ENSGALG00000000673	ENSGALT00000000950	26	1988007	2012399	1988007	2012399	TMCC2	ENSGALG00000000673	2.53199	2.45339
ENSGALG00000000680	ENSGALT00000000962	26	2015810	2024500	2015810	2024500	NUAK2	ENSGALG00000000680	0.520298	0.566272
ENSGALG00000000684	ENSGALT00000000967	26	2031384	2040291	2031384	2040291	KLHDC8A	ENSGALG00000000684	1.34906	1.24322
ENSGALG00000021706	ENSGALT00000035231	26	2045549	2051797	2045549	2051797		ENSGALG00000021706	0.628628	0.809744
ENSGALG00000000692	ENSGALT00000000975	26	2104478	2112977	2104478	2112977	CDK18	ENSGALG00000000692	1.50148	1.22824
ENSGALG00000000695	ENSGALT00000000983	26	2119309	2132518	2119309	2132518	MFSD4	ENSGALG00000000695	2.34281	2.1643
ENSGALG00000000701	ENSGALT00000000994	26	2138284	2146798	2138284	2146798	ELK4	ENSGALG00000000701	3.26058	3.24044
ENSGALG00000021702	ENSGALT00000035225	26	2159753	2162378	2159753	2162378		ENSGALG00000021702	0.675644	0.995469

## Sheet: Thymus
Ensembl Gene ID	Ensembl Transcript ID	Chr	Gene Start (bp)	Gene End (bp)	Transcript Start (bp)	Transcript End (bp)	RefGene Name	ENS	Line 63	Line 72
ENSGALG00000003849	ENSGALT00000006114	10	5146745	5227651	5146745	5227651	TRPM1	ENSGALG00000003849	0.841232	0.669056
ENSGALG00000003883	ENSGALT00000006179	10	5235131	5266963	5235131	5266963	MTMR10	ENSGALG00000003883	2.33752	2.43041
ENSGALG00000003897	ENSGALT00000006194	10	5271368	5286793	5271368	5286793	FAN1	ENSGALG00000003897	2.26218	2.29889
ENSGALG00000003906	ENSGALT00000006206	10	5287520	5294206	5287520	5294206	MPHOSPH10	ENSGALG00000003906	2.33584	2.3037
ENSGALG00000003913	ENSGALT00000034521	10	5299493	5303542	5299493	5303542	MCEE	ENSGALG00000003913	1.54884	1.55192
ENSGALG00000003930	ENSGALT00000006262	10	5356027	5394968	5356027	5394968	APBA2	ENSGALG00000003930	1.99819	1.9606
ENSGALG00000003944	ENSGALT00000006290	10	5396943	5466890	5396943	5466890	FAM189A1	ENSGALG00000003944	-0.273949	-0.364749
ENSGALG00000003970	ENSGALT00000034518	10	5524064	5593805	5524064	5593805	TJP1	ENSGALG00000003970	2.04119	2.28676
ENSGALG00000003985	ENSGALT00000006347	10	5713843	5728886	5713843	5728886	TARSL2	ENSGALG00000003985	1.93981	2.13729
CNV1	Deletion	10	5716844	5717897
ENSGALG00000026271	ENSGALT00000006419	10	5730113	5734914	5730113	5734914	TM2D3	ENSGALG00000026271	1.9683	2.07807
ENSGALG00000004038	ENSGALT00000039368	10	5735057	5743901	5735057	5743901	ADAL	ENSGALG00000004038	1.40945	1.36954
ENSGALG00000004046	ENSGALT00000006440	10	5747497	5754751	5747497	5754751	LARP6	ENSGALG00000004046	1.27034	1.1995
ENSGALG00000004059	ENSGALT00000006457	10	5755975	5794821	5755975	5794821	LRRC49	ENSGALG00000004059	-0.251373	0.417546
ENSGALG00000004087	ENSGALT00000006501	10	5850094	6086027	5850094	6086027	THSD4	ENSGALG00000004087	1.61672	1.48437
ENSGALG00000004096	ENSGALT00000006519	10	6156717	6199170	6156717	6199170	CHRNA7	ENSGALG00000004096	1.11589	1.75137
ENSGALG00000004103	ENSGALT00000006527	10	6216548	6227549	6216548	6227549	FAM81A	ENSGALG00000004103	0.443667	1.27642
ENSGALG00000000587	ENSGALT00000000819	26	1676675	1717188	1676675	1717188	PLEKHA6	ENSGALG00000000587	1.76493	1.62951
ENSGALG00000000611	ENSGALT00000000864	26	1725757	1731836	1725757	1731836	PPP1R15B	ENSGALG00000000611	2.67783	2.6499
ENSGALG00000000623	ENSGALT00000000884	26	1732339	1747306	1732339	1747306	PIK3C2B	ENSGALG00000000623	2.52584	2.10238
ENSGALG00000000636	ENSGALT00000000908	26	1759929	1772232	1759929	1772232	MDM4	ENSGALG00000000636	2.51663	2.52979
ENSGALG00000000644	ENSGALT00000035237	26	1841734	1918228	1841734	1918228	NFASC	ENSGALG00000000644	1.62556	1.32171
ENSGALG00000000644	ENSGALT00000000917	26	1841734	1918228	1841734	1918228	NFASC	ENSGALG00000000644	1.62556	1.32171
ENSGALG00000000644	ENSGALT00000000916	26	1841734	1918228	1841734	1918228	NFASC	ENSGALG00000000644	1.62556	1.32171
ENSGALG00000000644	ENSGALT00000040537	26	1841734	1918228	1841734	1918228	NFASC	ENSGALG00000000644	1.62556	1.32171
ENSGALG00000000644	ENSGALT00000040544	26	1841734	1918228	1841734	1918228	NFASC	ENSGALG00000000644	1.62556	1.32171
ENSGALG00000000653	ENSGALT00000000928	26	1920859	1944417	1920859	1944417	CNTN2	ENSGALG00000000653	1.20261	0.716975
CNV2	Deletion		1927477	1931663
ENSGALG00000000668	ENSGALT00000000943	26	1956516	1964897	1956516	1964897	RBBP5	ENSGALG00000000668	2.61084	2.61598
ENSGALG00000000670	ENSGALT00000035232	26	1967745	1987562	1967745	1987562	DSTYK	ENSGALG00000000670	1.94287	2.17421
ENSGALG00000000673	ENSGALT00000000950	26	1988007	2012399	1988007	2012399	TMCC2	ENSGALG00000000673	2.35464	2.0758
ENSGALG00000000680	ENSGALT00000000962	26	2015810	2024500	2015810	2024500	NUAK2	ENSGALG00000000680	1.19993	1.09236
ENSGALG00000000684	ENSGALT00000000967	26	2031384	2040291	2031384	2040291	KLHDC8A	ENSGALG00000000684	1.86962	1.85306
ENSGALG00000021706	ENSGALT00000035231	26	2045549	2051797	2045549	2051797		ENSGALG00000021706	1.48751	1.18509
ENSGALG00000000692	ENSGALT00000000975	26	2104478	2112977	2104478	2112977	CDK18	ENSGALG00000000692	0.82619	0.686179
ENSGALG00000000695	ENSGALT00000000983	26	2119309	2132518	2119309	2132518	MFSD4	ENSGALG00000000695	1.50176	1.59872
ENSGALG00000000701	ENSGALT00000000994	26	2138284	2146798	2138284	2146798	ELK4	ENSGALG00000000701	3.29375	3.37293
ENSGALG00000021702	ENSGALT00000035225	26	2159753	2162378	2159753	2162378		ENSGALG00000021702	1.20317	0.422973
